# Supplementary material
Source: Springer Nature journal article supplement (https://www.springermedizin.de/resource/supplementary/12936_2012_2602_MOESM1_ESM.pdf/9543242)

Goundam

Slide **55**

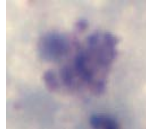

Gao

Slide **71**

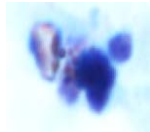

Slide **72**

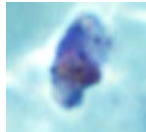

Slide **86**

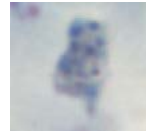

Slide **143**

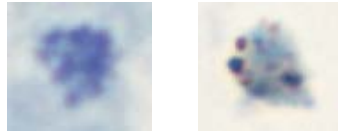

Slide **144**

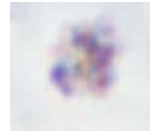

Slide **147**

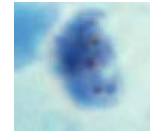

Tombouctou

Slide **56**

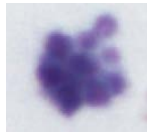

Slide **123**

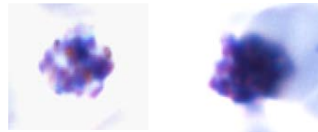

Slide **124**

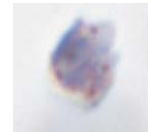

Slide **125**

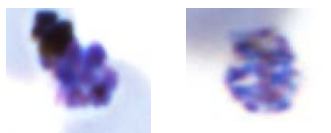

Slide **126**

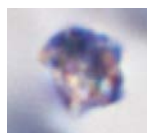

Slide **127**

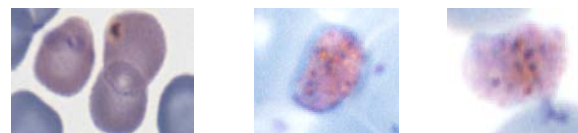

Supplement: MOESM1 [file 9543242]
